# Supplementary material for: Nitrosative Redox Homeostasis and Antioxidant Response Defense in Disused Vastus lateralis Muscle in Long-Term Bedrest (Toulouse Cocktail Study)
Source: MDPI journal article supplement (doi:10.3390/antiox10030378), 2021-03-03
Supplement: s1 [file s1]

**Method.** *Nuclear factor-erythroid-2-related factor 2 (Nrf-2) myonuclear localization*

A detailed subcellular localization analysis of Nrf2 in myonuclei indirectly is an index of the transcription factor activation ratio.

Human skeletal muscle biopsy cryosections (8  $\mu$ m thickness), from VL (n=7) pre-, post- and rec-BR groups, were double immunolabelled with anti-Dystrophin (mouse monoclonal 107416, Novocastra, Leica Biosystems.com) and anti-Nrf-2 (rabbit polyclonal, sc-13032, Santa Cruz, Santa Cruz Biotechnology, Inc.) antibodies. In all Nrf-2 immunostaining protocols goat anti-rabbit Alexa-488 for Nrf-2 and goat anti-mouse Alexa-555 for Dystrophin were used. Nuclei were routinely counterstained with blue DAPI.

Nrf-2 double immunostained muscle cryosections were inspected by confocal microscopy (Leica TCS SP8, leica-microsystems.com) for high resolution immunosignal detection of Nrf2-accumulation in myonuclei. At least 70 myonuclei were scored for each pre-, post-BR, and R+10 muscle biopsy/subject.

**Figure S 2.** Anti-oxidative master gene Nrf-2 regulation in VL of bed rest subjects. **a.** Representative image Nrf-2 immunopositive myonuclei (green) in VL before (Pre) and after (Post) bedrest in CTR and Cocktail group. Dystrophin (red) used as reference marker to label the subsarcolemmal plasma membrane border; nuclei were counterstained with DAPI (blue). Inset, magnification Nrf-2 positive myonuclei for comparison with Nrf-2 negative myonuclei and nuclei outside the myofiber. **b.** Quantitative analysis of Nrf-2 positive myonuclei in VL. The total number of Nrf-2 positive myonuclei was decreased in both VL CTR (Pre,  $18.95 \pm 3.56\%$ , Post,  $2.38 \pm 0.94\%$ ,  $p \leq 0.001$ ) and Cocktail (Pre,  $23.4 \pm 4.43\%$ , Post,  $8.27 \pm 1.94\%$ ,  $p \leq 0.05$ ) group. (\* = significant difference, ANOVA and *t*-test, n= 10, *p*-value  $\leq 0.05$ ). The graph represents the mean  $\pm$  SEM.

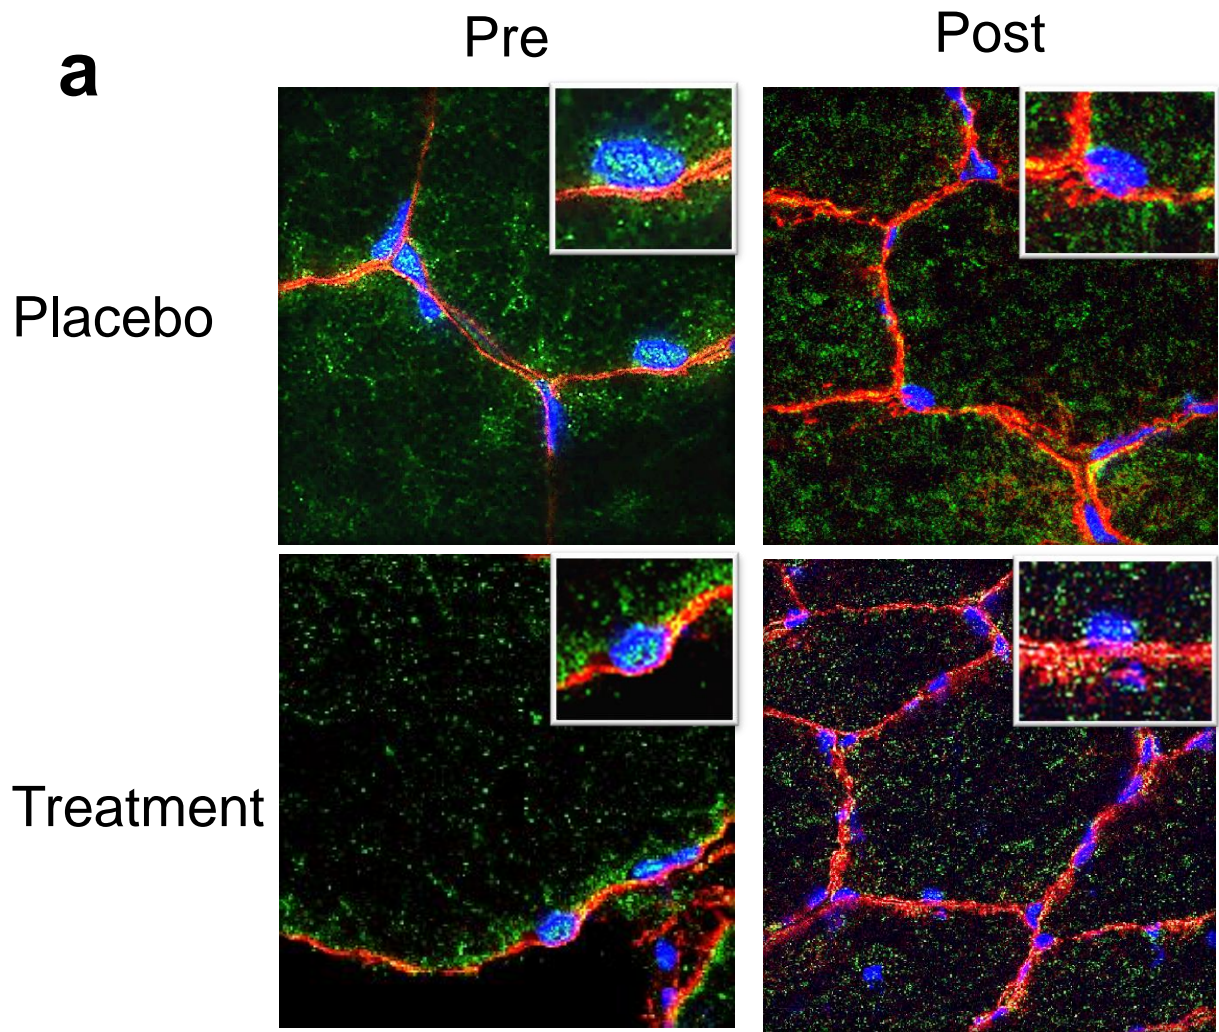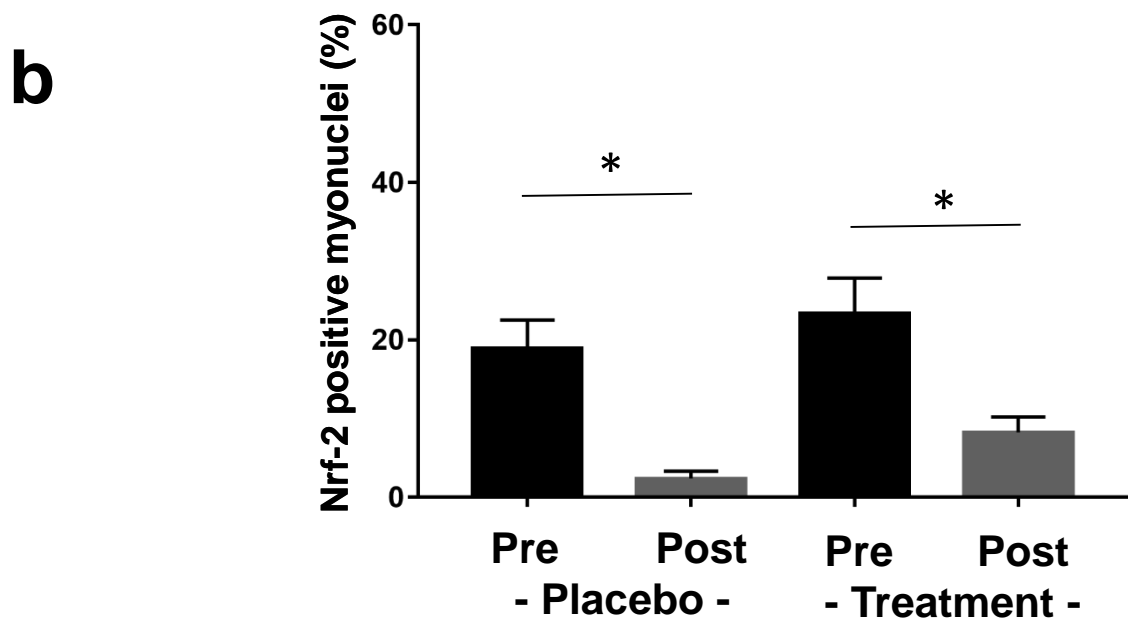

Figure S4
