# Supplementary material for: Nitrosative Redox Homeostasis and Antioxidant Response Defense in Disused Vastus lateralis Muscle in Long-Term Bedrest (Toulouse Cocktail Study)
Source: MDPI journal article supplement (doi:10.3390/antiox10030378), 2021-03-03
Supplement: s1 [file s1]

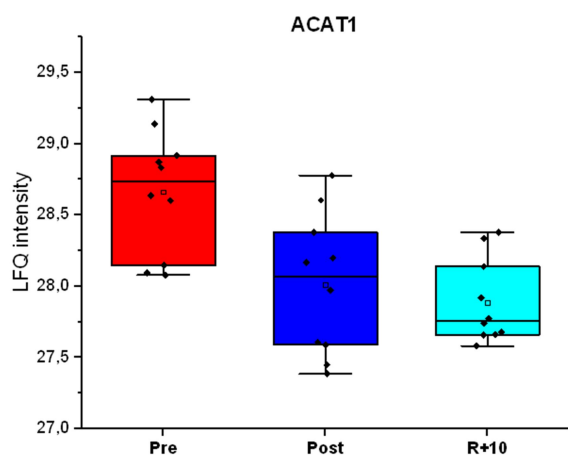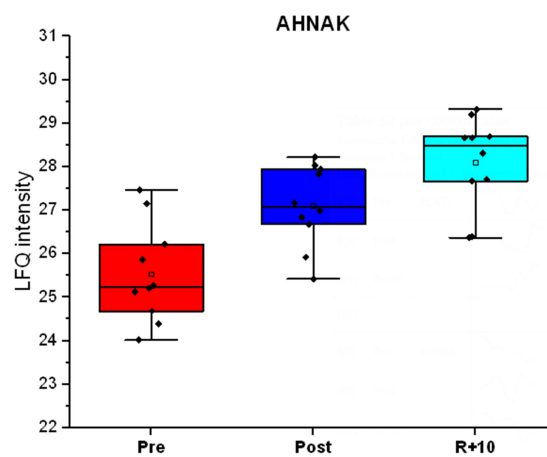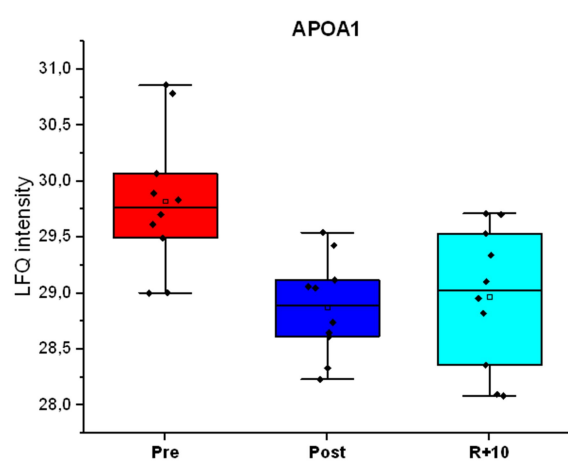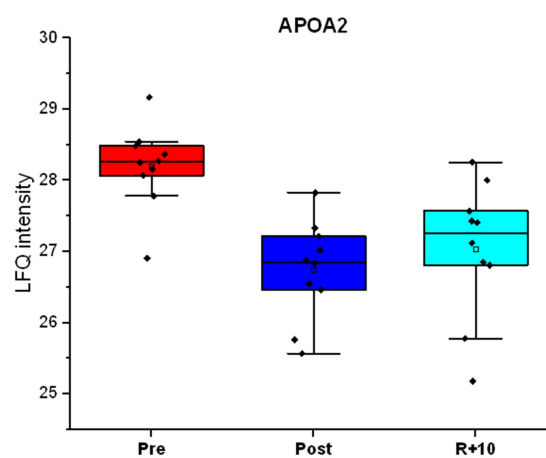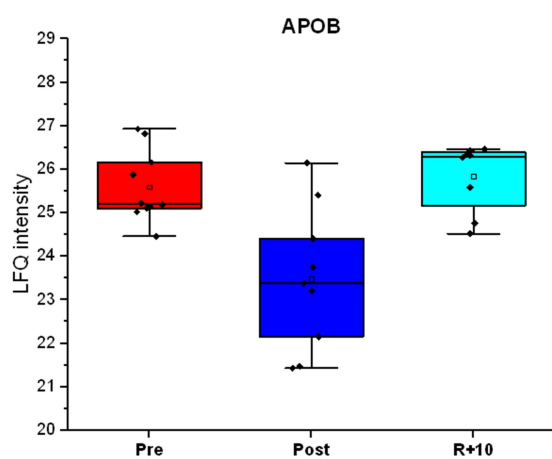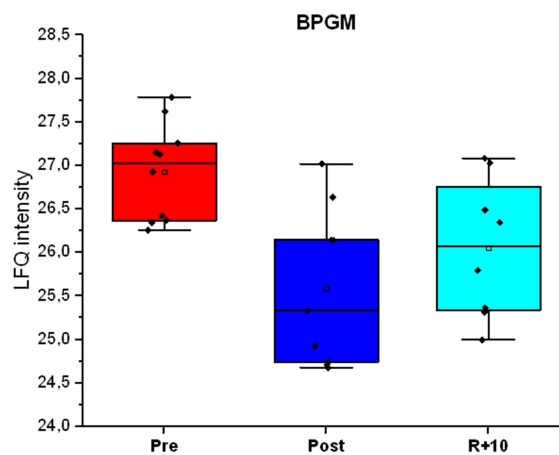

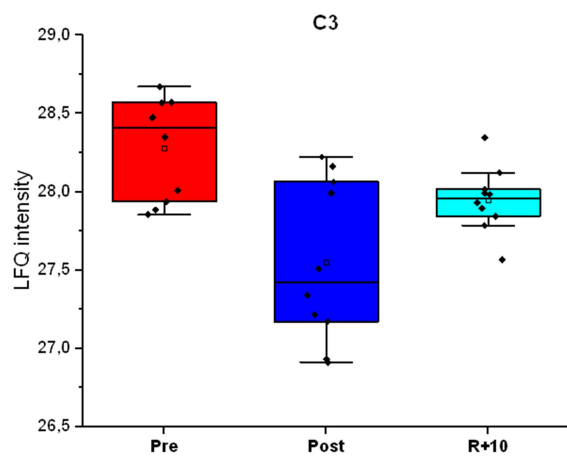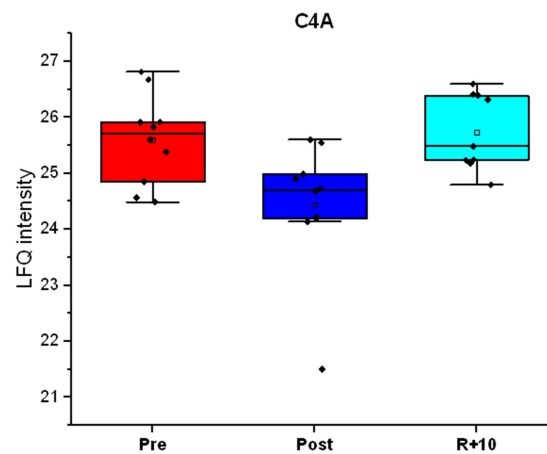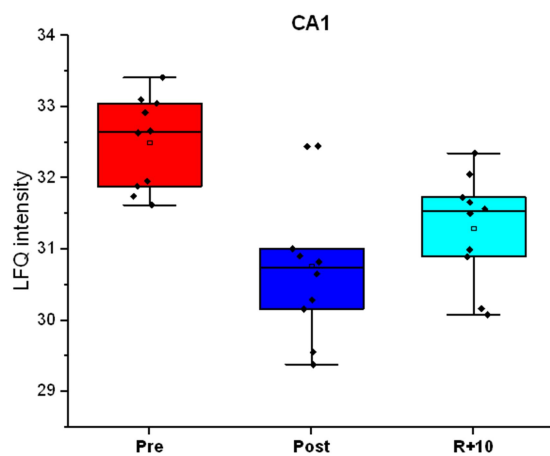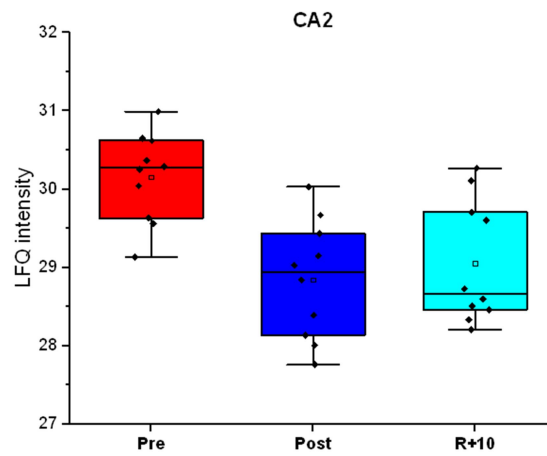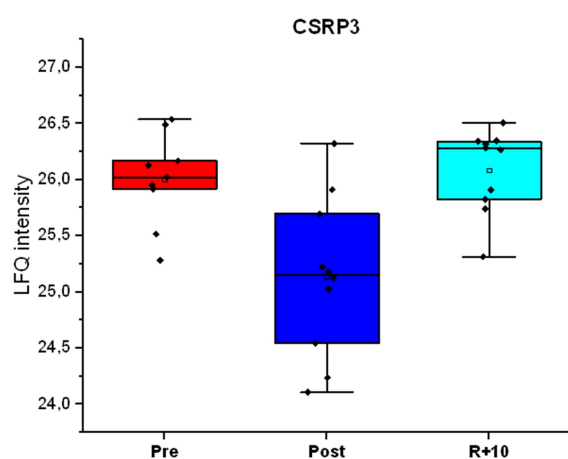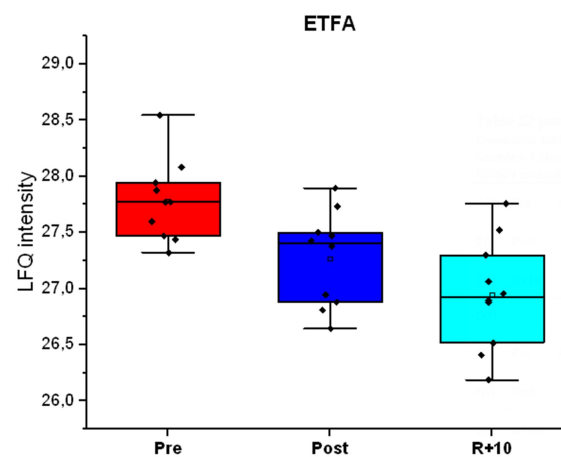

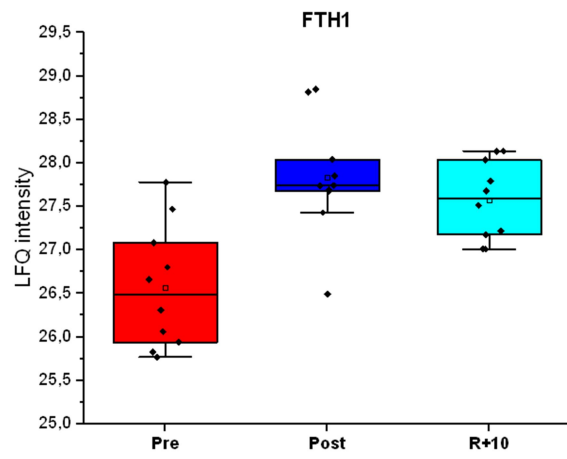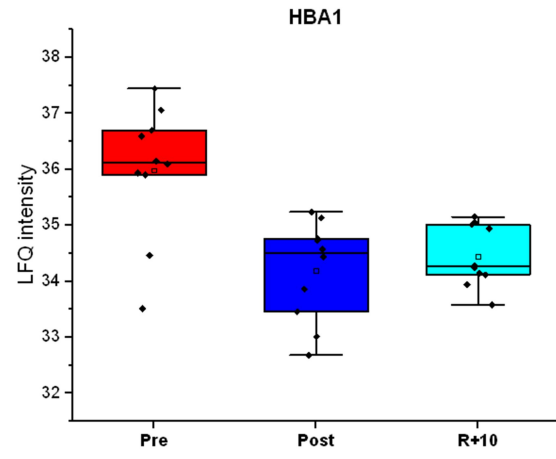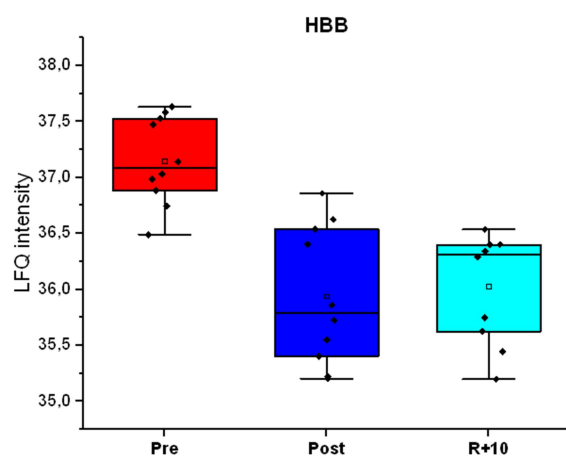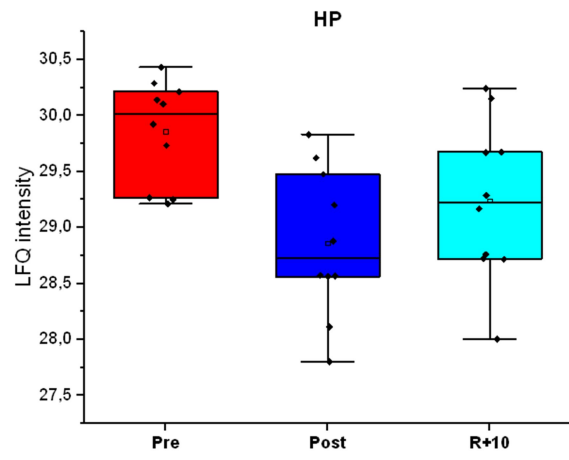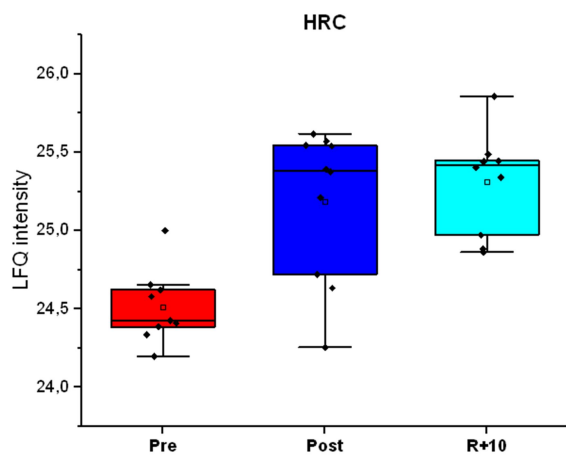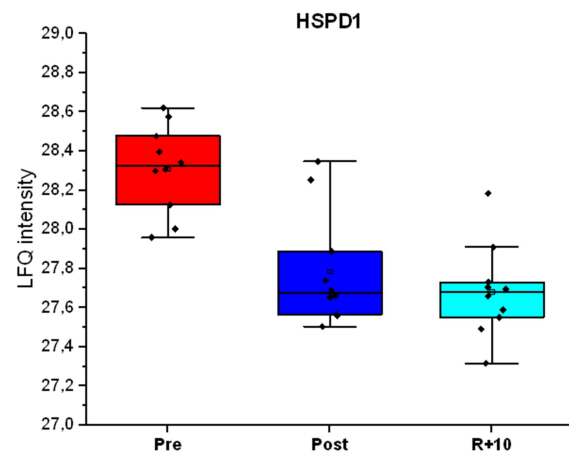

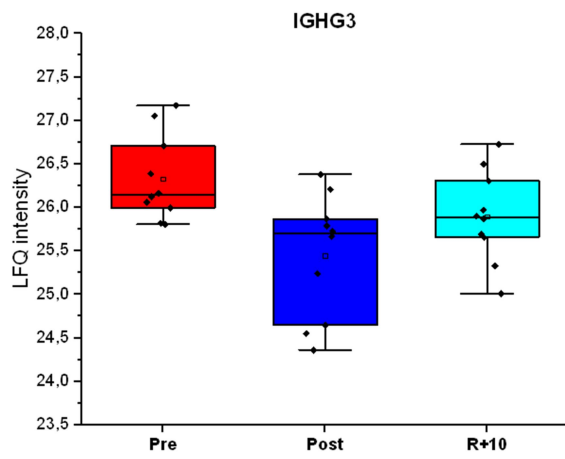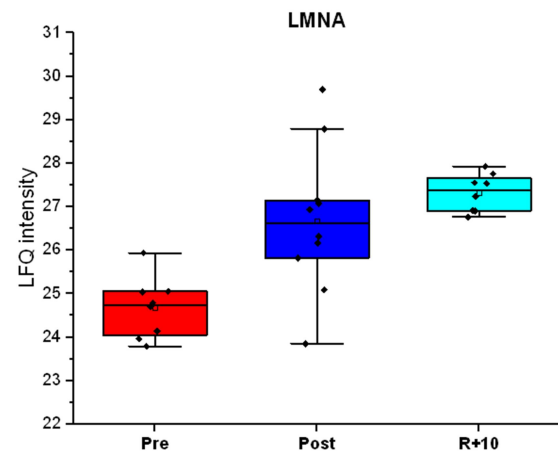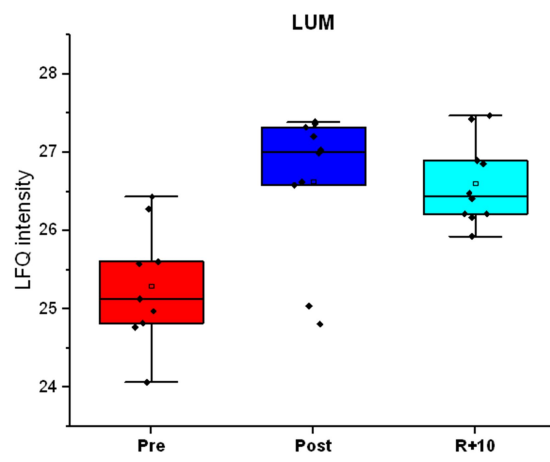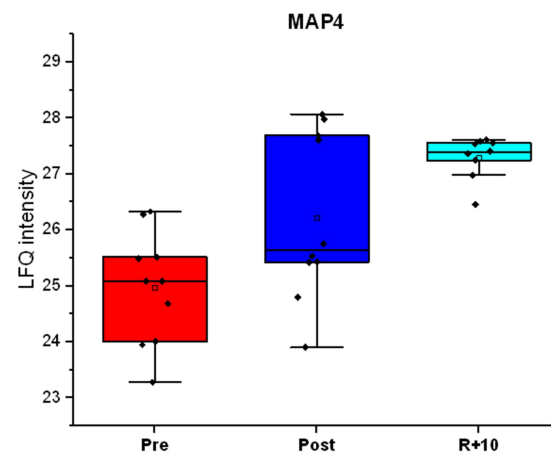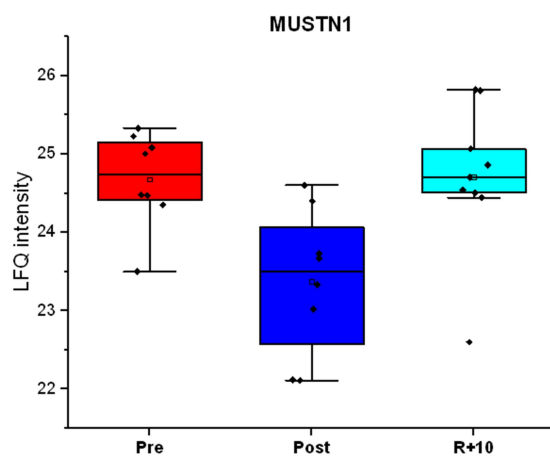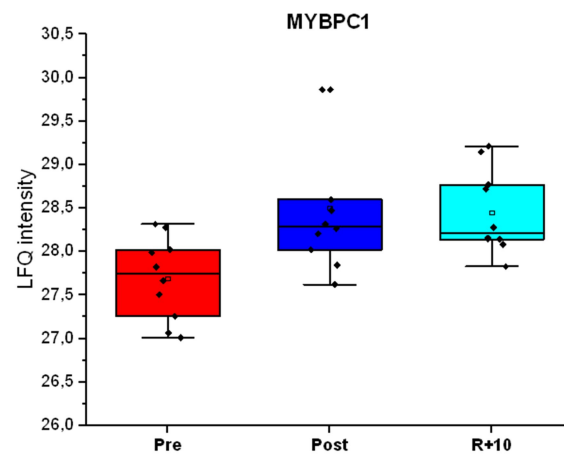

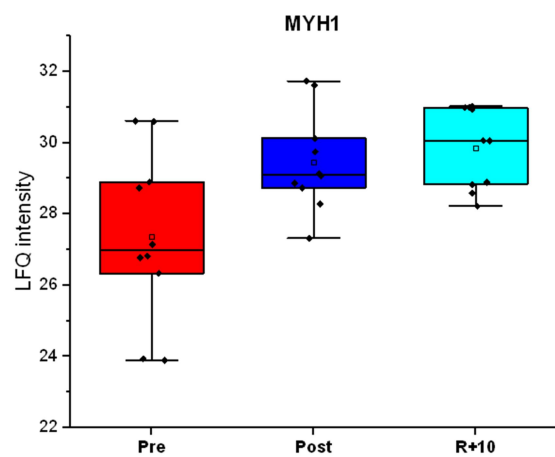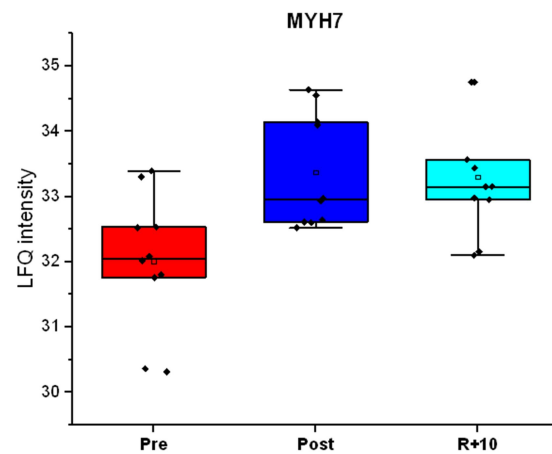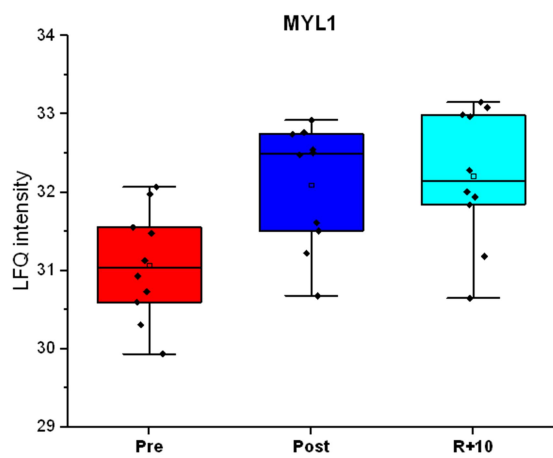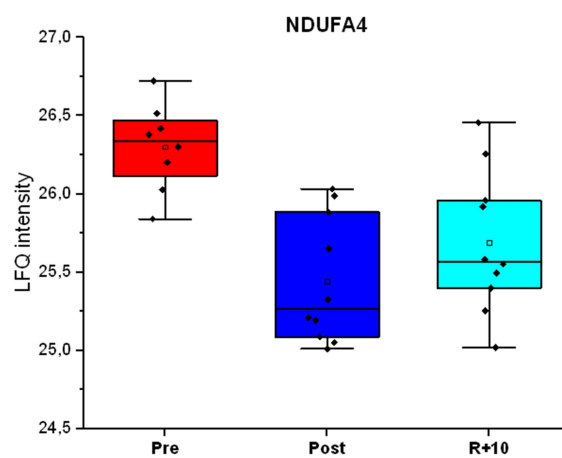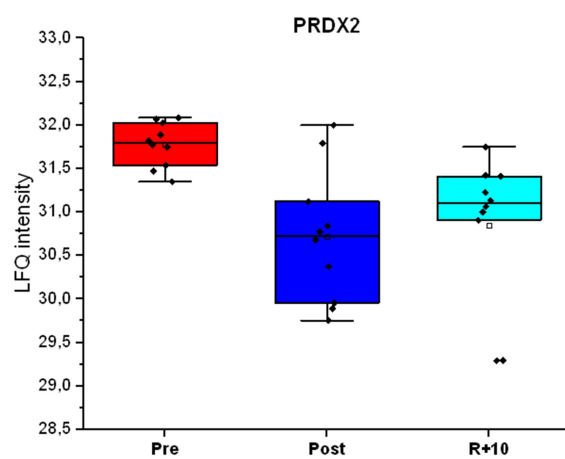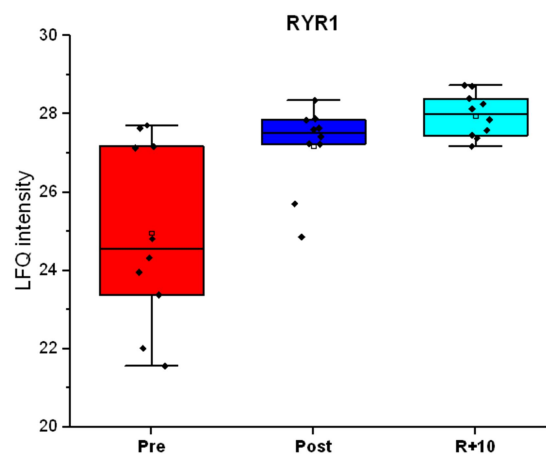

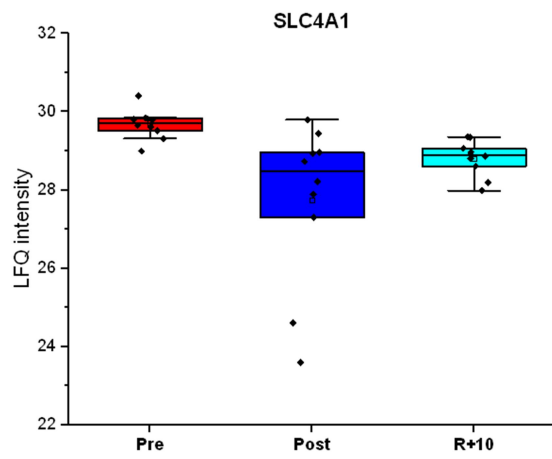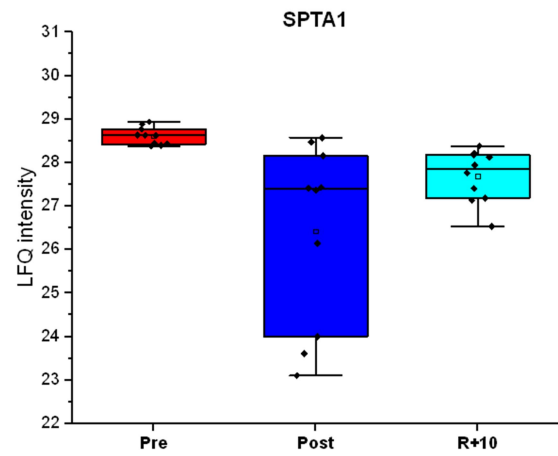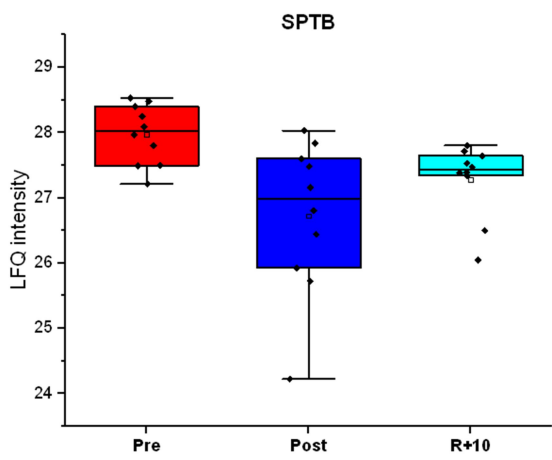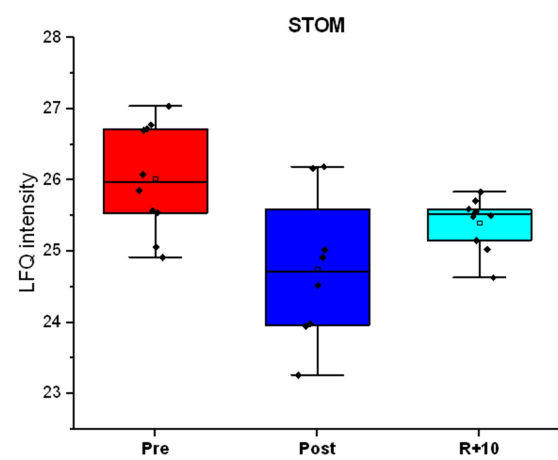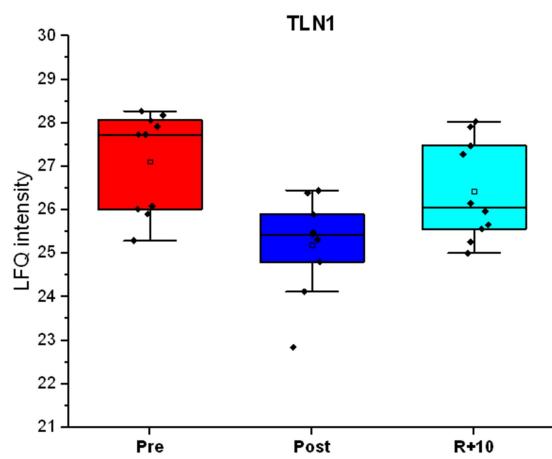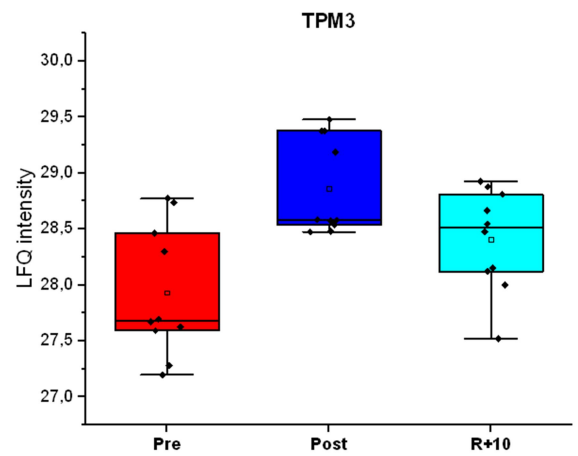

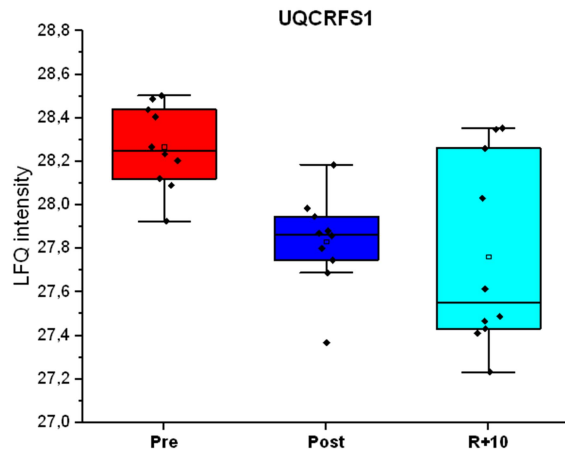

**Figure S2.** Box-plots of all differentially expressed proteins in Treatment bed rest subjects representing individual variability within the group (Pre, Post and R+10). LFQ = Label-free quantification.
